# Supplementary material for: Selective removal and recovery of Ni(ii) using a sulfonic acid-based magnetic rattle-type ion-imprinted polymer: adsorption performance and mechanisms
Source: Royal Society of Chemistry journal article supplement (doi:10.1039/d2ra06918k), 2022-01-01
Supplement: d2ra06918k3.pdf [file d2ra06918k3.pdf]

## Supplementary Material

### **Selective removal and recovery of Ni(II) using a sulfonic-based magnetic rattle-type ion-imprinted polymer: Adsorption performance and mechanisms**

Weiye Zhang<sup>a</sup>, Xiujun Deng<sup>b</sup>, Siqing Ye<sup>a</sup>, Yan Xia<sup>a</sup>, Lingling Li<sup>a</sup>, Weili Li<sup>a</sup> and Hongxing He<sup>\*a</sup>

<sup>a</sup> Yunnan Key Laboratory of Food Safety Testing Technology, Kunming University, Kunming 650214, China.

<sup>b</sup> Yunnan Key Laboratory of Metal-Organic Molecular Materials and Device, School of Chemistry and Chemical Engineering, Kunming University, Kunming 650214, China

*\*Correspondence to:* Hongxing He (hxhe0212@kmu.edu.cn).

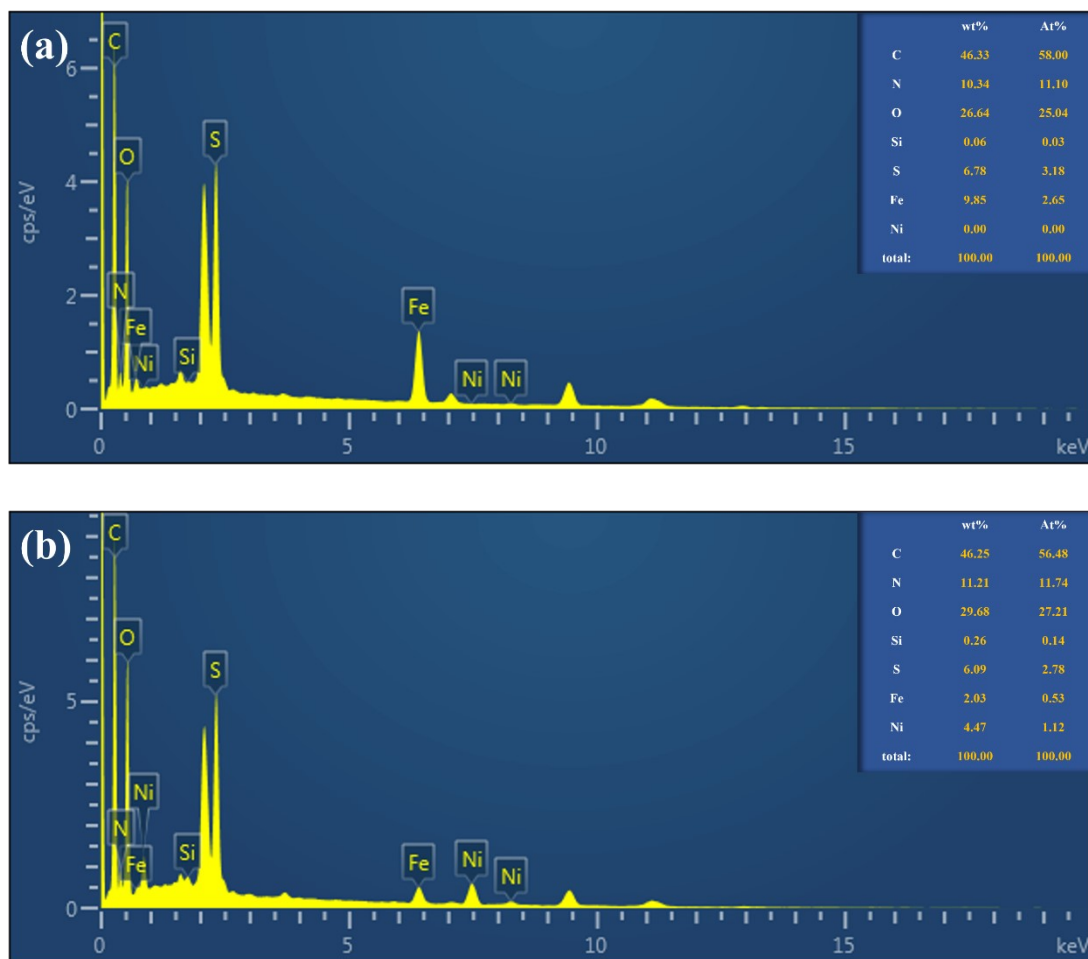

**Fig. S1.** EDS spectra of (a)  $\text{Fe}_3\text{O}_4@void@IIP\text{-Ni(II)}$  before adsorption, (b)  $\text{Fe}_3\text{O}_4@void@IIP\text{-Ni(II)}$  after adsorption

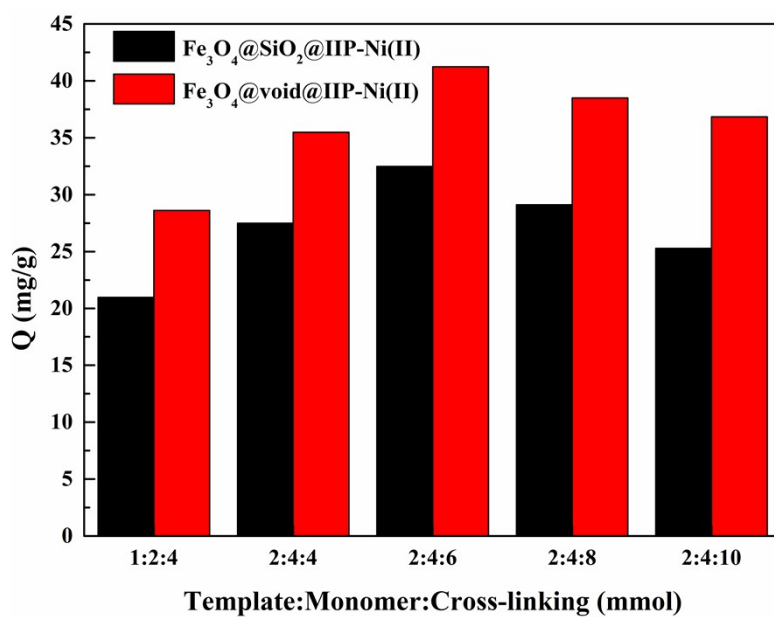

**Fig. S2.** Effect of the dosage of template, monomer, and cross-linking on the adsorption performance.

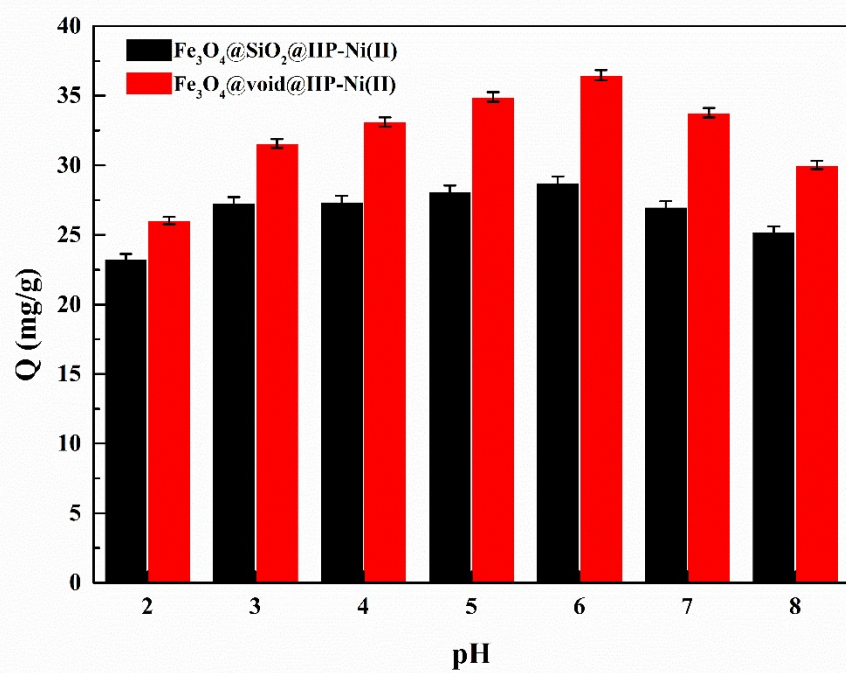

**Fig. S3.** Effect of pH on the adsorption.

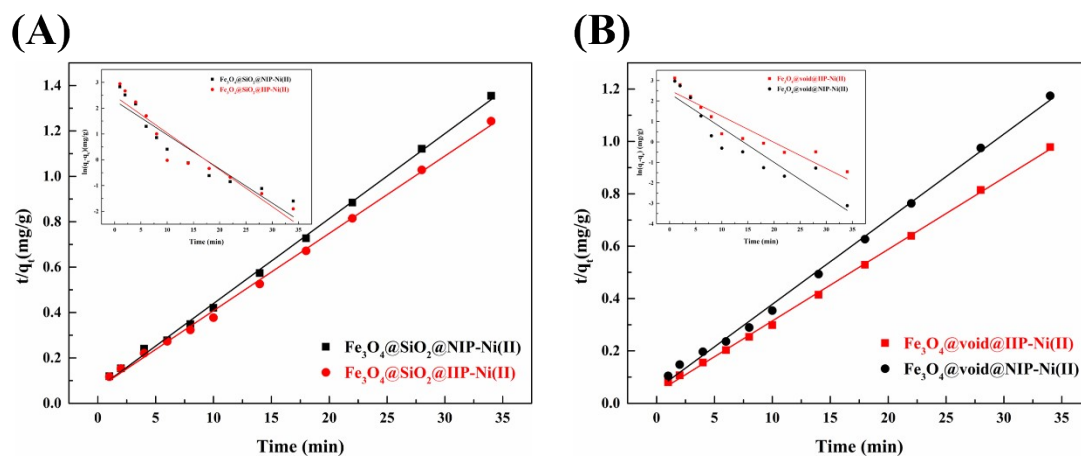

**Fig. S4.** Pseudo-second-order kinetic model of  $\text{Fe}_3\text{O}_4@SiO_2@IIP$  (or NIP) and  $\text{Fe}_3\text{O}_4@void@IIP$  (or NIP). (the inset was the Pseudo-first-order kinetic model).

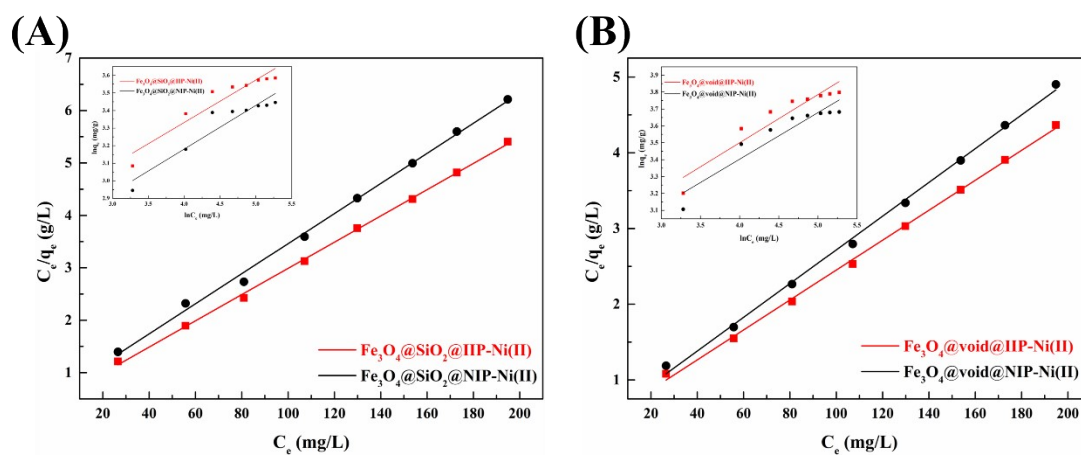

**Fig. S5.** Langmuir isotherm models of  $\text{Fe}_3\text{O}_4@\text{SiO}_2@\text{IIP}$  (or NIP) and  $\text{Fe}_3\text{O}_4@\text{void@IIP}$  (or NIP). (the inset was the Freundlich isotherm models).

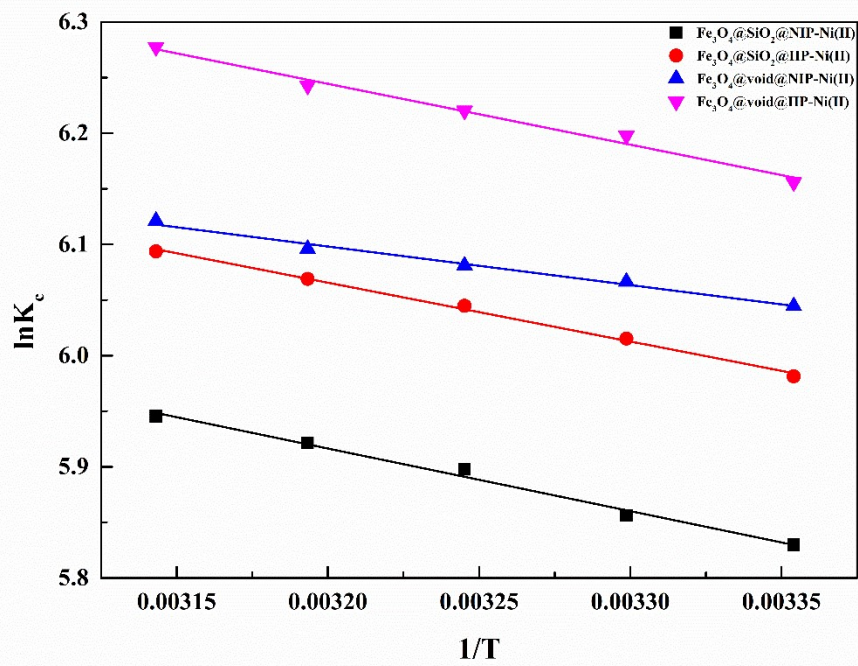

Fig. S6. Plot of  $\ln K_c$  versus  $1/T$ .

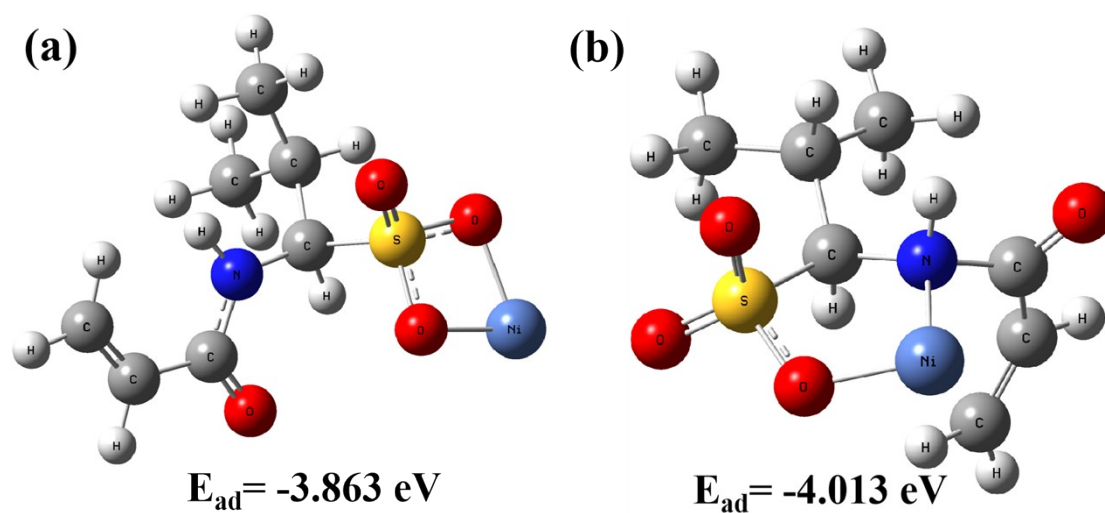

**Fig. S7** The optimized structure of the complexes formed by functional group with Ni(II).



**Table S1.** Comparison of adsorption properties of adsorbents for Ni(II)

| Adsorbents                                      | Equilibrium time | Adsorption capacity | Removal rate | Reference |
|-------------------------------------------------|------------------|---------------------|--------------|-----------|
| IICFMPSs                                        | 20 min           | 41.95 mg/g          | NA           | 1         |
| Ni-MIIP                                         | 60 min           | 18.50 mg/g          | NA           | 2         |
| FPCC                                            | 2 h              | 19.00 mg/g          | 99.7%        | 3         |
| Ni (II)-IIP                                     | 15 min           | 40.29 mg/g          | NA           | 4         |
| SMIA                                            | 100 min          | 38.49 mg/g          | NA           | 5         |
| IIPCIO4                                         | NA               | 11.74 mg/g          | NA           | 6         |
| Fe <sub>3</sub> O <sub>4</sub> /SBP             | 40 min           | 9.39 mg/g           | 81.2%        | 7         |
| CMF                                             | NA               | 11.63mg/g           | NA           | 8         |
| CTS-REC                                         | NA               | 13.32mg/g           | NA           | 9         |
| Fe <sub>3</sub> O <sub>4</sub> @void@IIP-Ni(II) | 10 min           | 44.64 mg/g          | 99.97%       | This work |

**Table S2.** Thermodynamic parameters for Ni(II) adsorption.

| Adsorbent                                                    | Temperature (K) | $\Delta G$ (kJ/mol) | $\Delta H$ (kJ/mol) | $\Delta S$ (J/mol·K) |
|--------------------------------------------------------------|-----------------|---------------------|---------------------|----------------------|
| Fe <sub>3</sub> O <sub>4</sub> @void@IIP-Ni(II)              | 298             | -15.259             | 45.480              | 66.470               |
|                                                              | 303             | -15.621             |                     |                      |
|                                                              | 308             | -15.936             |                     |                      |
|                                                              | 313             | -16.253             |                     |                      |
|                                                              | 318             | -16.604             |                     |                      |
| Fe <sub>3</sub> O <sub>4</sub> @void@NIP-Ni(II)              | 298             | -14.984             | 28.825              | 59.924               |
|                                                              | 303             | -15.230             |                     |                      |
|                                                              | 308             | -15.579             |                     |                      |
|                                                              | 313             | -15.871             |                     |                      |
|                                                              | 318             | -16.192             |                     |                      |
| Fe <sub>3</sub> O <sub>4</sub> @SiO <sub>2</sub> @IIP-Ni(II) | 298             | -14.827             | 44.018              | 64.516               |
|                                                              | 303             | -15.161             |                     |                      |
|                                                              | 308             | -15.487             |                     |                      |
|                                                              | 313             | -15.801             |                     |                      |
|                                                              | 318             | -16.119             |                     |                      |
| Fe <sub>3</sub> O <sub>4</sub> @SiO <sub>2</sub> @NIP-Ni(II) | 298             | -14.451             | 46.801              | 64.166               |
|                                                              | 303             | -14.760             |                     |                      |
|                                                              | 308             | -15.109             |                     |                      |
|                                                              | 313             | -15.417             |                     |                      |
|                                                              | 318             | -15.726             |                     |                      |

**Table S3.** Selectivity parameters of IIPs and NIPs .

| Metal ion | Sorbent                                                      | Distribution ratio $D$ (mL/g) | Selectivity coefficient ( $k$ ) | Relative selective coefficient ( $k'$ ) |
|-----------|--------------------------------------------------------------|-------------------------------|---------------------------------|-----------------------------------------|
| Ni(II)    | Fe <sub>3</sub> O <sub>4</sub> @SiO <sub>2</sub> @IIP-Ni(II) | 87546.30                      |                                 |                                         |
|           | Fe <sub>3</sub> O <sub>4</sub> @SiO <sub>2</sub> @NIP-Ni(II) | 4259.83                       |                                 |                                         |
|           | Fe <sub>3</sub> O <sub>4</sub> @void@IIP-Ni(II)              | 3249293.29                    |                                 |                                         |
|           | Fe <sub>3</sub> O <sub>4</sub> @void@NIP-Ni(II)              | 157930.44                     |                                 |                                         |
| Co(II)    | Fe <sub>3</sub> O <sub>4</sub> @SiO <sub>2</sub> @IIP-Ni(II) | 19031.14                      | 4.60                            | 4.30                                    |
|           | Fe <sub>3</sub> O <sub>4</sub> @SiO <sub>2</sub> @NIP-Ni(II) | 3984.82                       | 1.07                            |                                         |
|           | Fe <sub>3</sub> O <sub>4</sub> @void@IIP-Ni(II)              | 695750.49                     | 4.67                            | 3.65                                    |
|           | Fe <sub>3</sub> O <sub>4</sub> @void@NIP-Ni(II)              | 123362.69                     | 1.28                            |                                         |
| Cu(II)    | Fe <sub>3</sub> O <sub>4</sub> @SiO <sub>2</sub> @IIP-Ni(II) | 17099.37                      | 4.12                            | 3.65                                    |
|           | Fe <sub>3</sub> O <sub>4</sub> @SiO <sub>2</sub> @NIP-Ni(II) | 3767.01                       | 1.13                            |                                         |
|           | Fe <sub>3</sub> O <sub>4</sub> @void@IIP-Ni(II)              | 647093.86                     | 4.62                            | 3.58                                    |
|           | Fe <sub>3</sub> O <sub>4</sub> @void@NIP-Ni(II)              | 125560.36                     | 1.29                            |                                         |
| Pb(II)    | Fe <sub>3</sub> O <sub>4</sub> @SiO <sub>2</sub> @IIP-Ni(II) | 9991.70                       | 8.76                            | 6.84                                    |
|           | Fe <sub>3</sub> O <sub>4</sub> @SiO <sub>2</sub> @NIP-Ni(II) | 3326.52                       | 1.28                            |                                         |
|           | Fe <sub>3</sub> O <sub>4</sub> @void@IIP-Ni(II)              | 363544.54                     | 8.94                            | 6.80                                    |
|           | Fe <sub>3</sub> O <sub>4</sub> @void@NIP-Ni(II)              | 120095.65                     | 1.32                            |                                         |
| Zn(II)    | Fe <sub>3</sub> O <sub>4</sub> @SiO <sub>2</sub> @IIP-Ni(II) | 9694.39                       | 9.03                            | 5.15                                    |
|           | Fe <sub>3</sub> O <sub>4</sub> @SiO <sub>2</sub> @NIP-Ni(II) | 2428.03                       | 1.75                            |                                         |
|           | Fe <sub>3</sub> O <sub>4</sub> @void@IIP-Ni(II)              | 335423.83                     | 9.69                            | 4.75                                    |
|           | Fe <sub>3</sub> O <sub>4</sub> @void@NIP-Ni(II)              | 77422.02                      | 2.04                            |                                         |

**Table S4.** Fukui function ( $f^-$ ) of atoms on potential adsorption sites from AMPS<sup>-</sup> molecule.

| Atom   | $f^-$ Fukui function |
|--------|----------------------|
| N (9)  | 0.2744               |
| S (10) | -0.0213              |
| O (11) | 0.1135               |
| O (12) | 0.0873               |
| O (13) | 0.0691               |

**Table S5.** Partial bond lengths and Wiberg bond order of AMPS<sup>-</sup> and AMPS-Ni(II)

| Items             | Bond lengths Å |       |       | Wiberg bond order |       |       |
|-------------------|----------------|-------|-------|-------------------|-------|-------|
|                   | S10-O13        | C1-N9 | C5-N9 | S10-O13           | C1-N9 | C5-N9 |
| AMPS <sup>-</sup> | 1.463          | 1.437 | 1.342 | 2.213             | 1.256 | 1.610 |
| AMPS-Ni(II)       | 1.536          | 1.492 | 1.472 | 1.683             | 1.159 | 1.183 |

## Reference

- 1 G. Zhou, S. Wu, R. Zhou, C. Wang, Z. Song, R.H. B. Miller, T. Hao and R. Yang, *J. Clean. Prod.* 2021, **314**, 127999.
- 2 Y. Chen, X. Ma and J. Peng, *Carbohydr. Polym.* 2021, **271**, 118435.
- 3 J. Wu, X. Cheng and G. Yang, *Int. J. Biol. Macromol.* 2019, **125**, 404-413.
- 4 S. Abbasi, M. Roushani, H. Khani, R. Sahraei and G. Mansouri, *Spectrochim. Acta A*, 2015, **140**, 534-543.
- 5 Q. Li, H. Su, J. Li and T. Tan, *J. Environ. Manage.* 2007, **85**, 900-907.
- 6 K. Laatikainen, D. Udomsap, H. Siren, H. Brisset, T. Sainio and C. Branger, *Talanta*, 2015, **134**, 538-545.
- 7 S.M.O. Sadat, S. Kucukcongar and M. Turkyilmaz, *Int. J. of Phytoremediat.*, DOI: 10.1080/15226514.2022.2093832.
- 8 J. Wang, M. Liu, C. Duan, S. Jian and X. Yao, *Carbohydr. Polym.*, 2019, **206**, 837-843.
- 9 L. Zeng, Y. Chen, Q. Zhang, X. Guo, Y. Peng, H. Xiao, X. Chen and X. Luo, *Carbohydr. Polym.*, 2015, **130**, 333-343.
